# Supplementary material
Source: MDPI journal article supplement (https://www.mdpi.com/2073-4352/13/10/1454)
Supplement: s1 [file s1]

# Supplementary Information for

## Effects of Conjugation Spacers in Diketopyrrolopyrrole-Based Copolymers for All-Polymer-Based Photodiodes

Hyunbum Kang <sup>1,†</sup>, Hyungjun Kim <sup>1,†</sup>, Ajeong Choi <sup>1</sup>, Youngjun Yun <sup>2,\*</sup> and Gaehwang Lee <sup>1,\*</sup>

<sup>1</sup> Material Research Center, Samsung Advanced Institute of Technology (SAIT), Samsung Electronics, Suwon 16678, Republic of Korea

<sup>2</sup> School of Semiconductor Display Technology, Hallym University, Chuncheon 24252, Republic of Korea

\* Correspondence: youngjun.yun@hallym.ac.kr (Y.Y.); gaehwang.lee@samsung.com (G.H.L.)

† These authors contributed equally to this work.

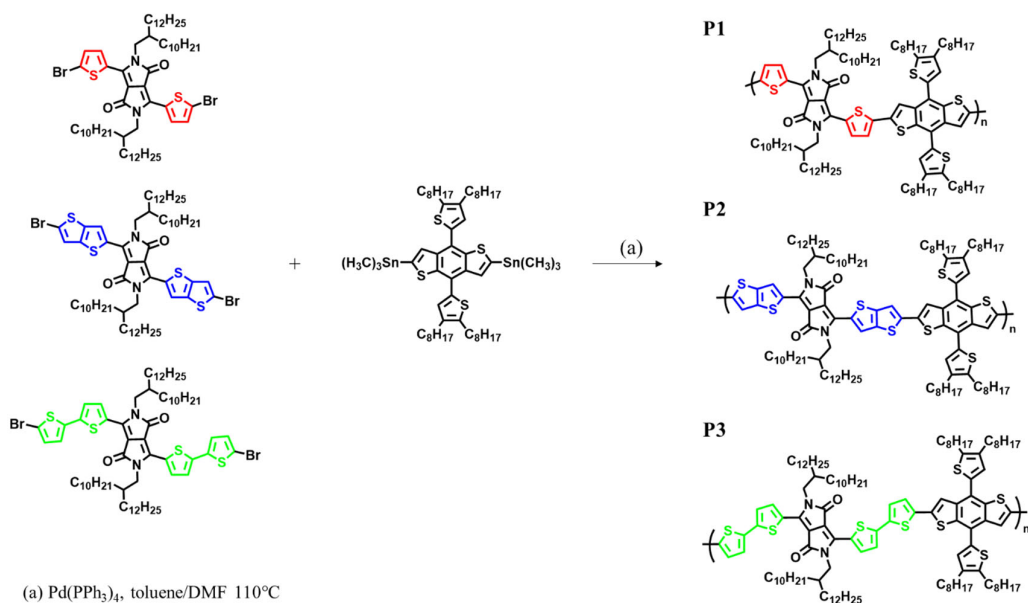

**Figure S1.** Synthetic procedures for P1, P2 and P3

(a)  $^1\text{H}$  NMR spectrum (500MHz,  $\text{CDCl}_3$ ) of Br-T-DPP-T-Br

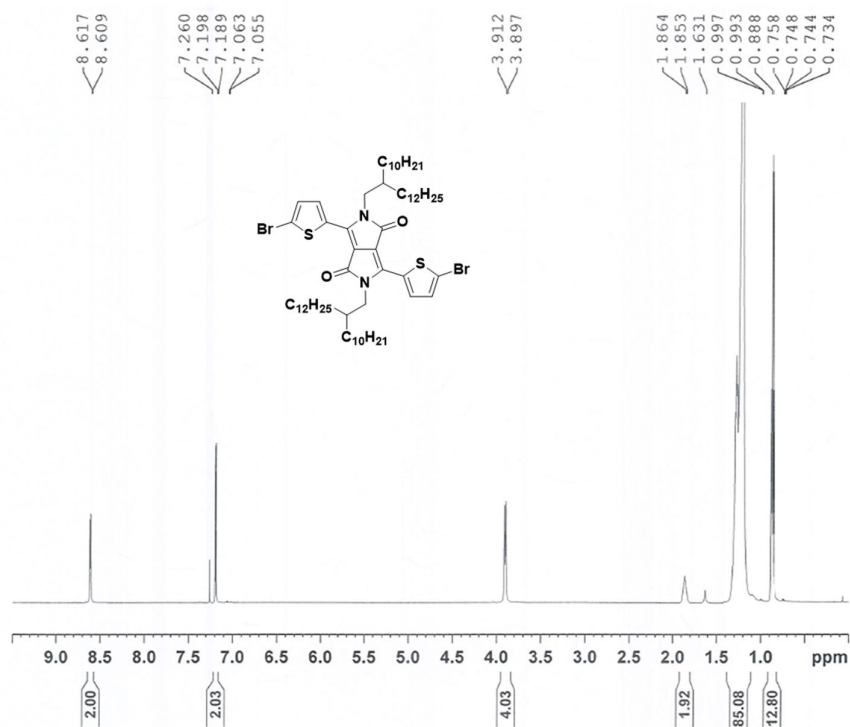

(b)  $^{13}\text{C}$  NMR spectrum (500MHz,  $\text{CDCl}_3$ ) of Br-T-DPP-T-Br

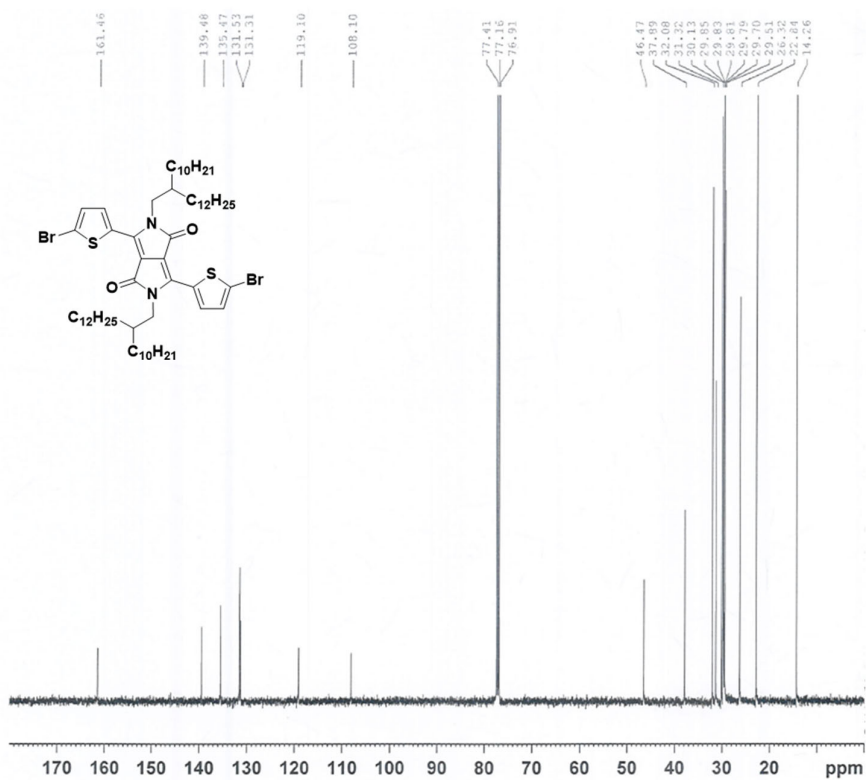

(c)  $^1\text{H}$  NMR spectrum (500MHz,  $\text{CDCl}_3$ ) of Br-TT-DPP-TT-Br

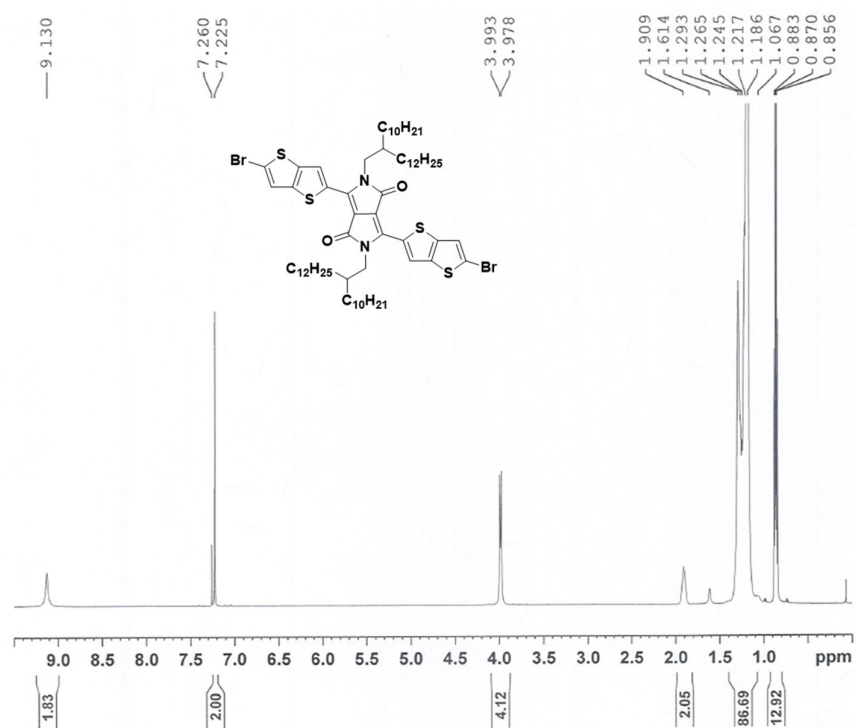

(d)  $^{13}\text{C}$  NMR spectrum (500MHz,  $\text{CDCl}_3$ ) of Br-TT-DPP-TT-Br

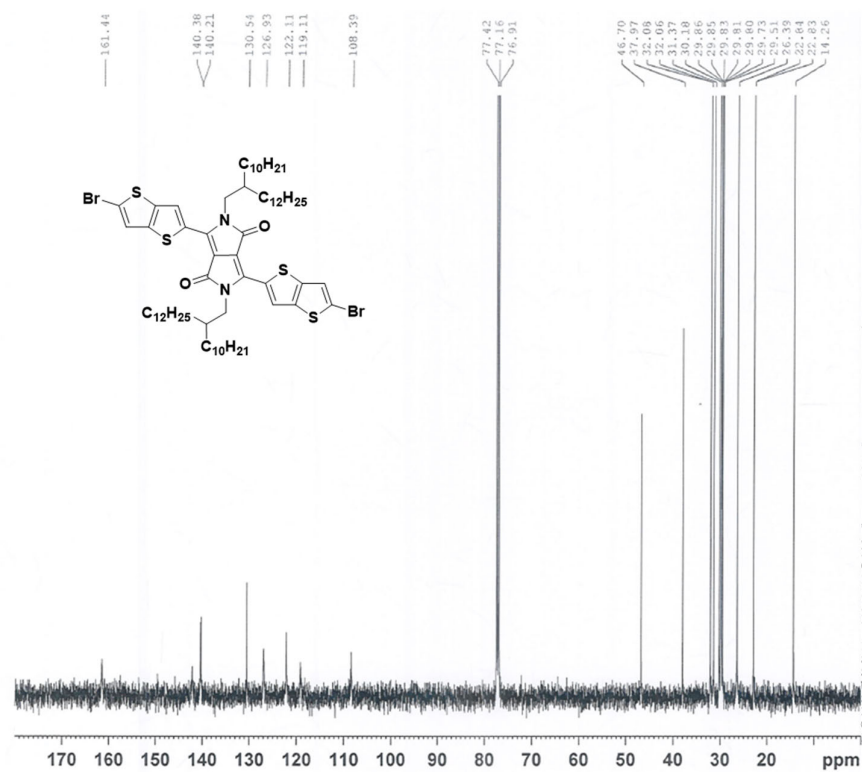

(e)  $^1\text{H}$  NMR spectrum (500MHz,  $\text{CDCl}_3$ ) of Br-BT-DPP-BT-Br

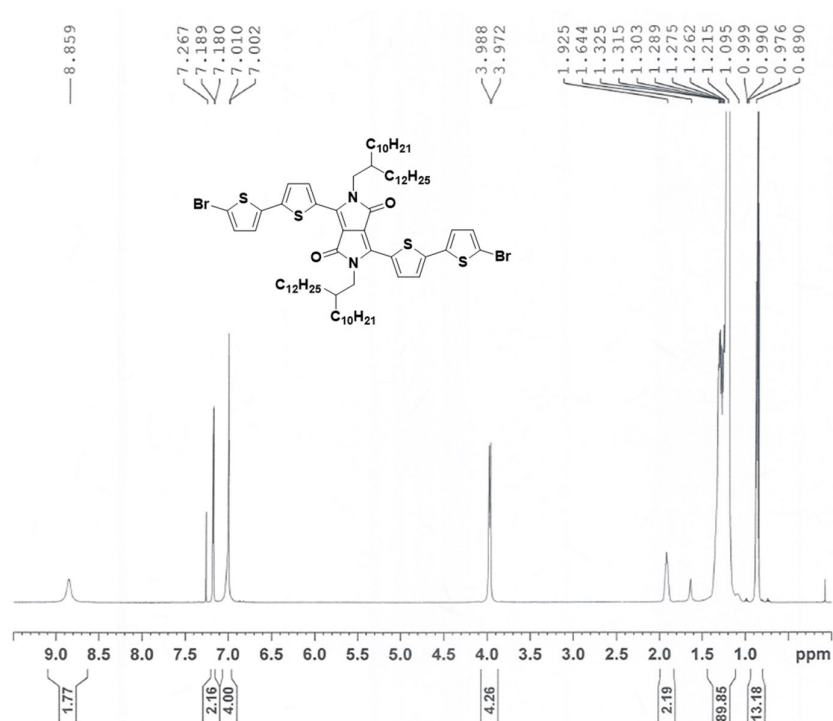

(f)  $^{13}\text{C}$  NMR spectrum (500MHz,  $\text{CDCl}_3$ ) of Br-BT-DPP-BT-Br

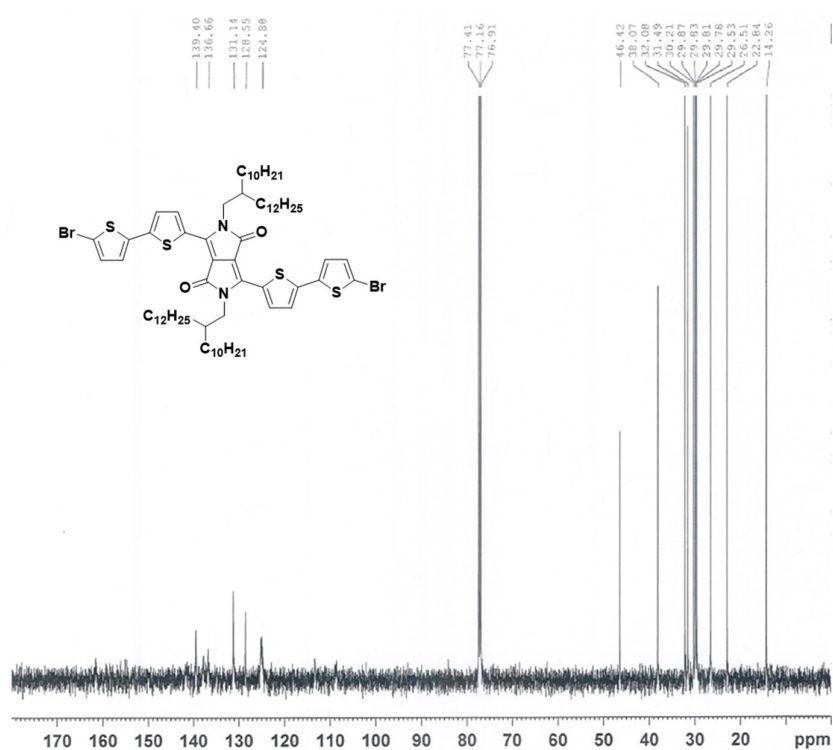

(g)  $^1\text{H}$  NMR spectrum (500MHz,  $\text{CDCl}_3$ ) of Tin-BDT-Tin

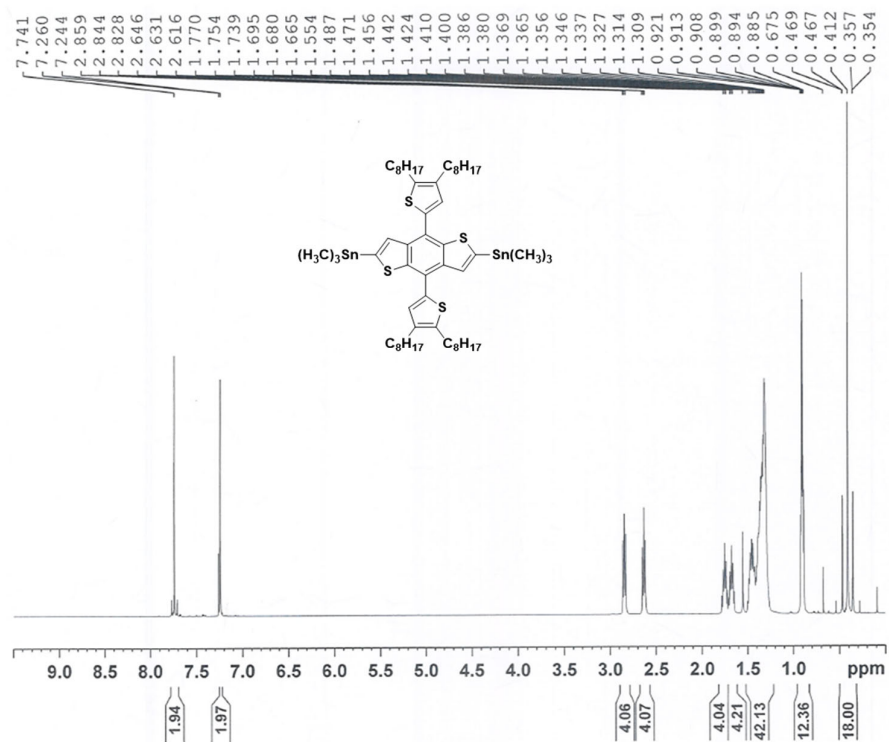

(h)  $^{13}\text{C}$  NMR spectrum (500MHz,  $\text{CDCl}_3$ ) of Tin-BDT-Tin

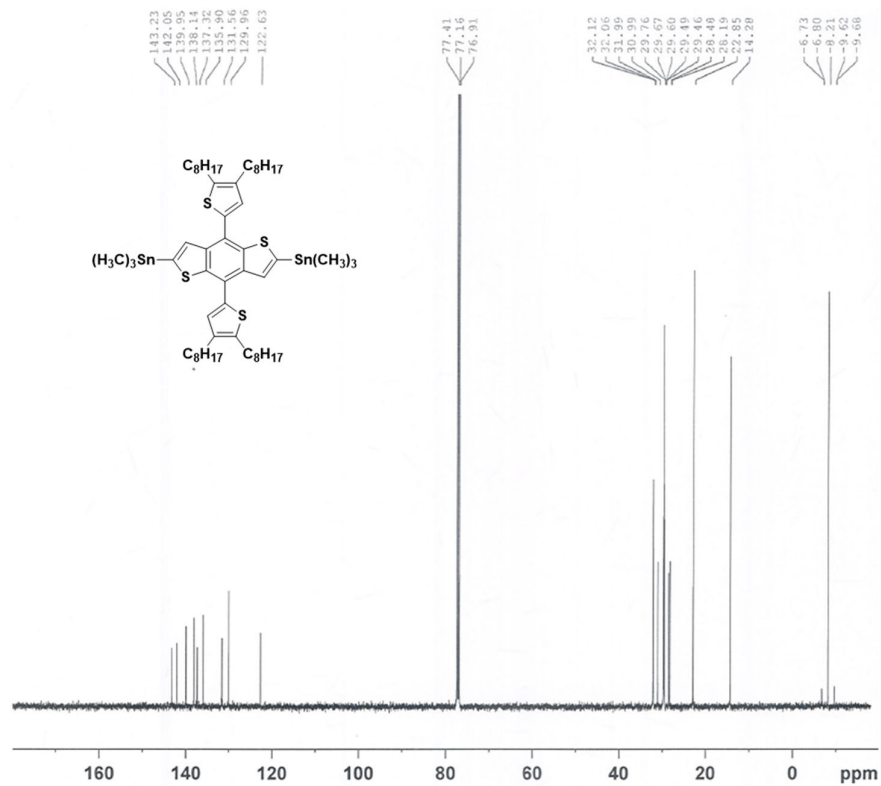

(i)  $^1\text{H}$  NMR spectrum (500MHz,  $\text{CDCl}_3$ ) of P1(T-DPP-T-BDT)

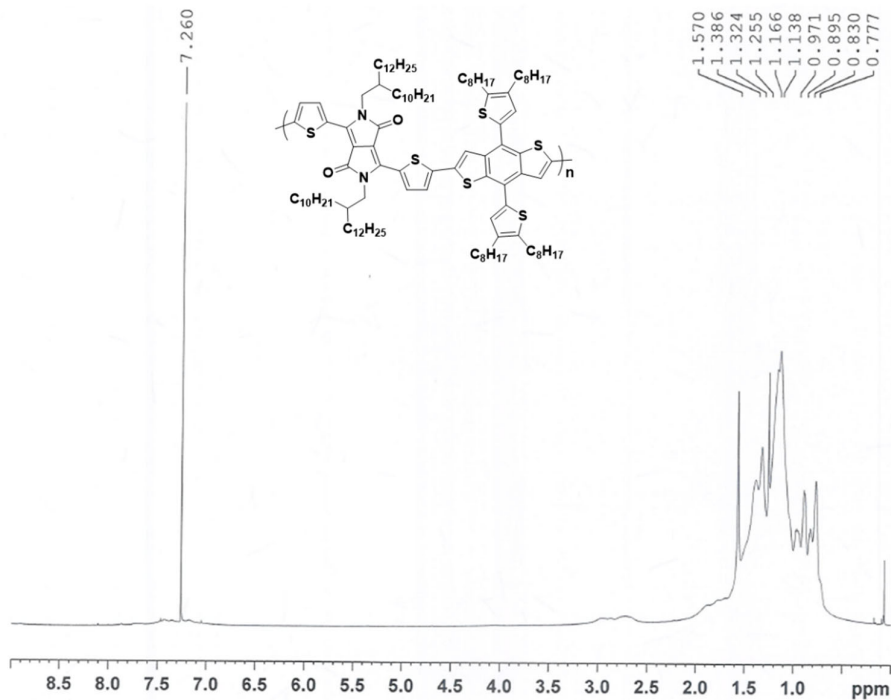

(j)  $^1\text{H}$  NMR spectrum (500MHz,  $\text{CDCl}_3$ ) of P2(TT-DPP-TT-BDT)

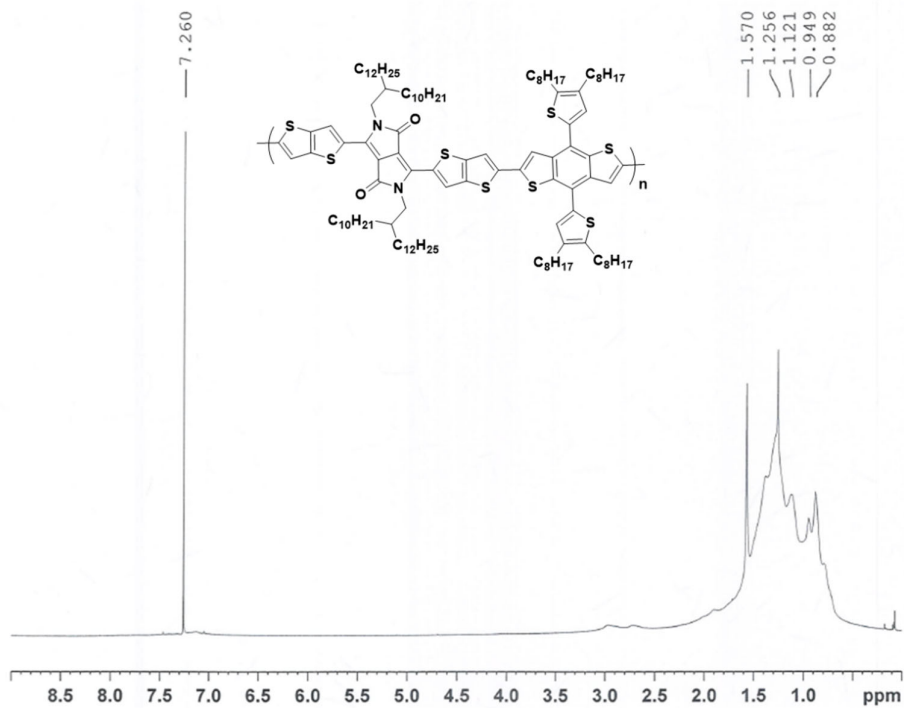

(k)  $^1\text{H}$  NMR spectrum (500MHz,  $\text{CDCl}_3$ ) of P3(BT-DPP-BT-BDT)

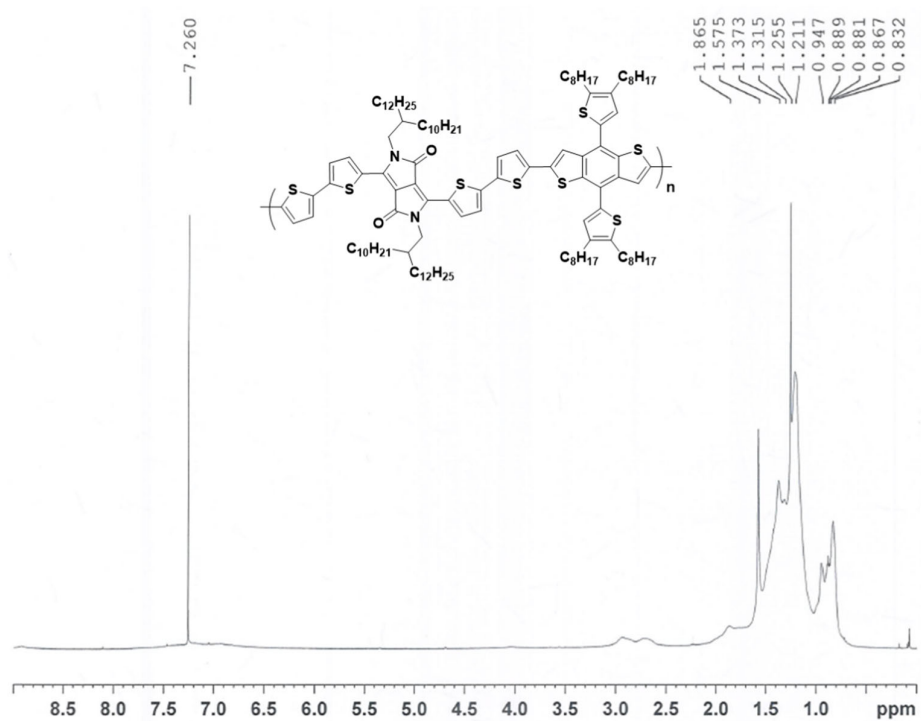

**Figure S2.** NMR characterizations of monomers (a-h) and polymers (i-k) used in this study

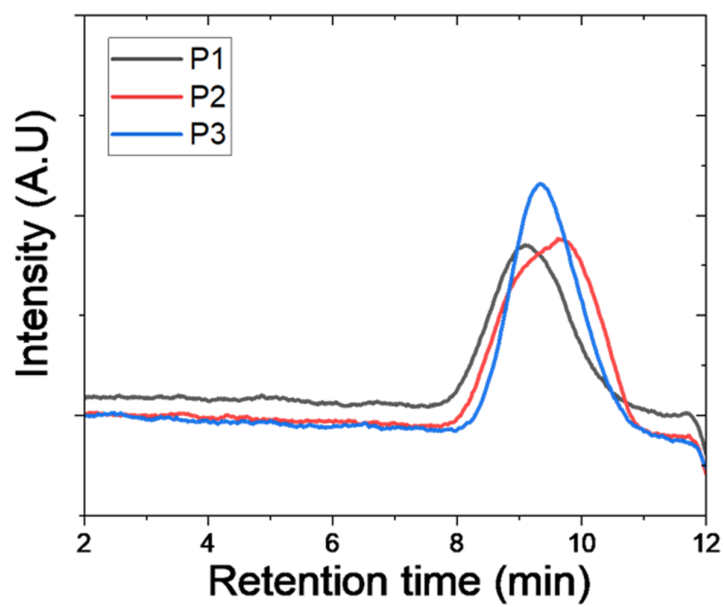

**Figure S3.** GPC profiles of three PDs (P1, P2, and P3)

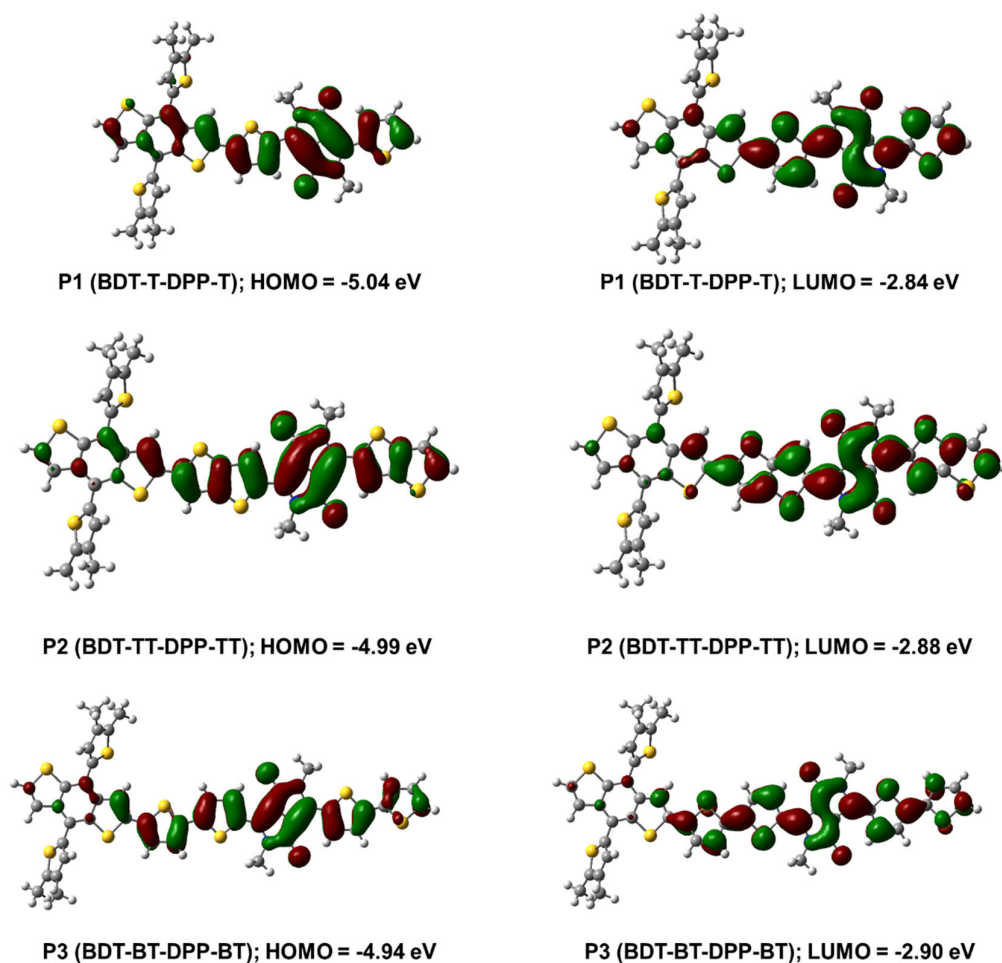

**Figure S4.** DFT calculation for estimation of HOMO/LUMO levels of P1, P2 and P3 polymers

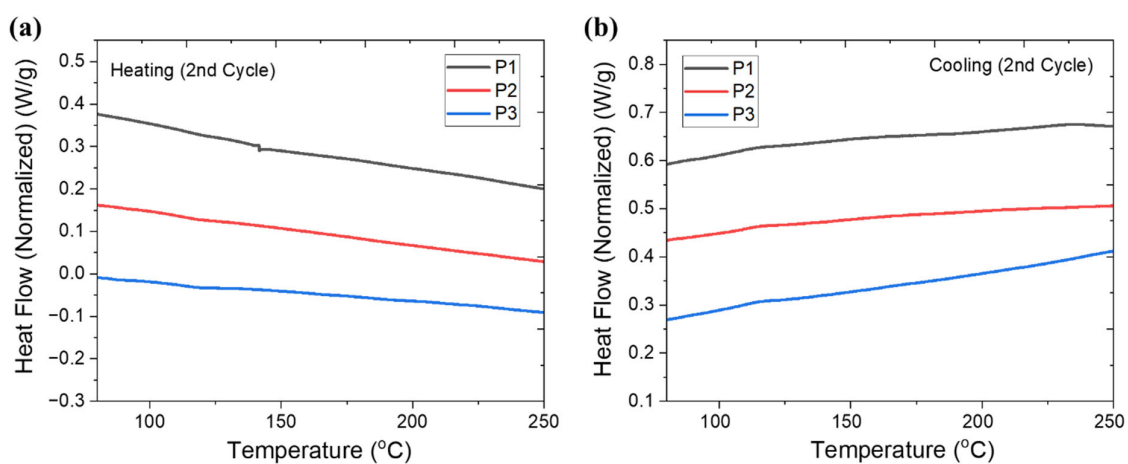

**Figure S5.** DSC measurements for P1, P2 and P3 ((a) 2nd cycle of heating, (b) 2nd cycle of



cooling)

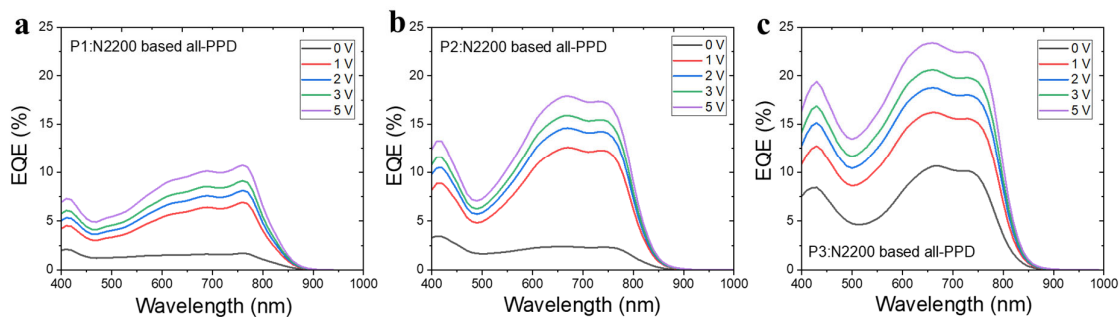

**Figure S6.** EQE vs bias dependency of P1 (a), P2 (b), and P3-based all-PPD devices (c)

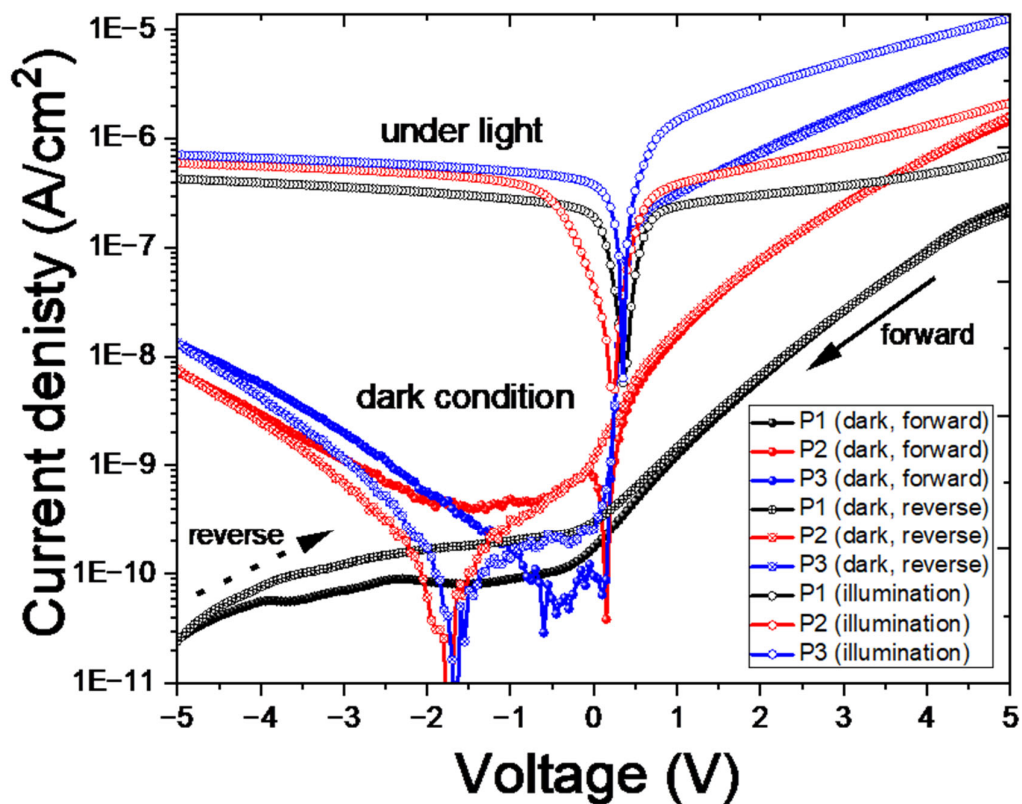

**Figure S7.** J-V curves of three Pds based all-PPDs under the dark condition (forward and reverse scan) and under the white light

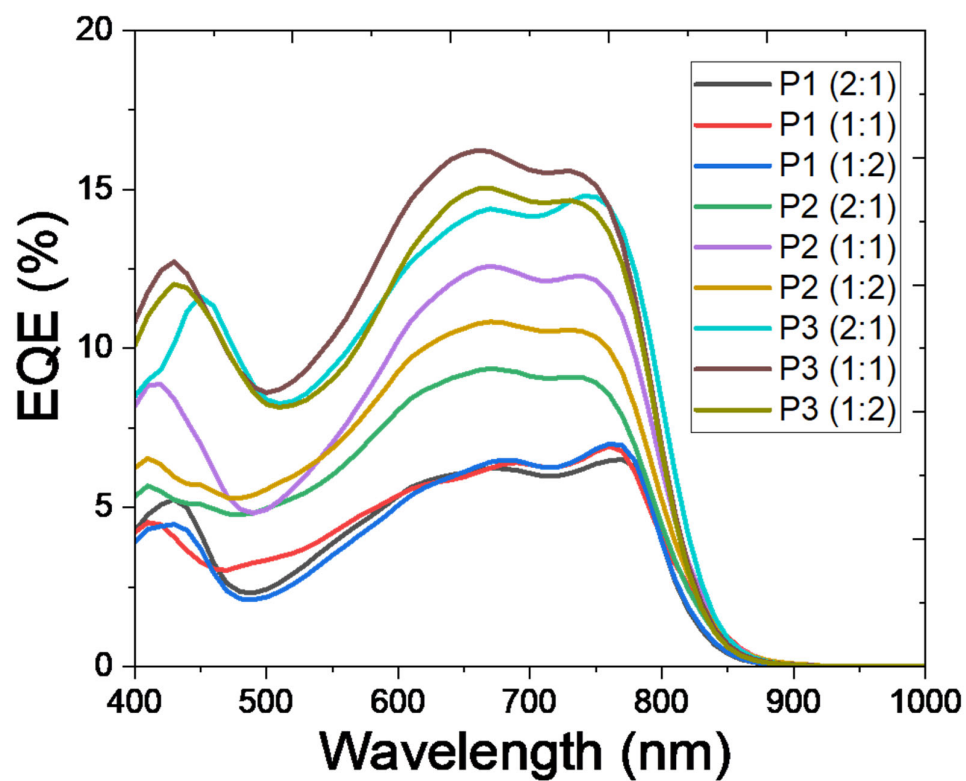

**Figure S8.** EQE curves of three PDs based all-PPDs with different PD:PA weight ratios (reverse bias =  $-1\text{V}$ )

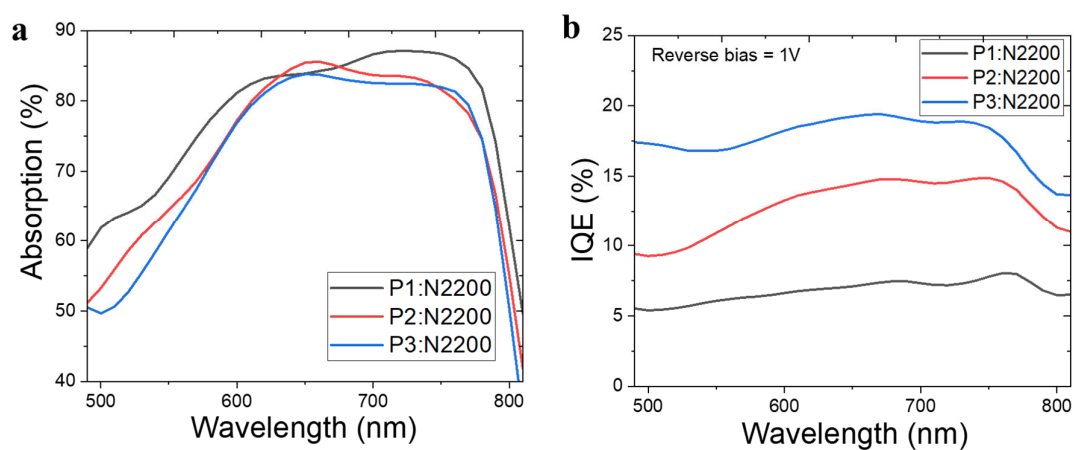

**Figure S9.** (a) Device absorption spectra, and (b) IQE spectra (reverse bias =  $1\text{V}$ ) of P1, P2, and P3 based all-PPDs.

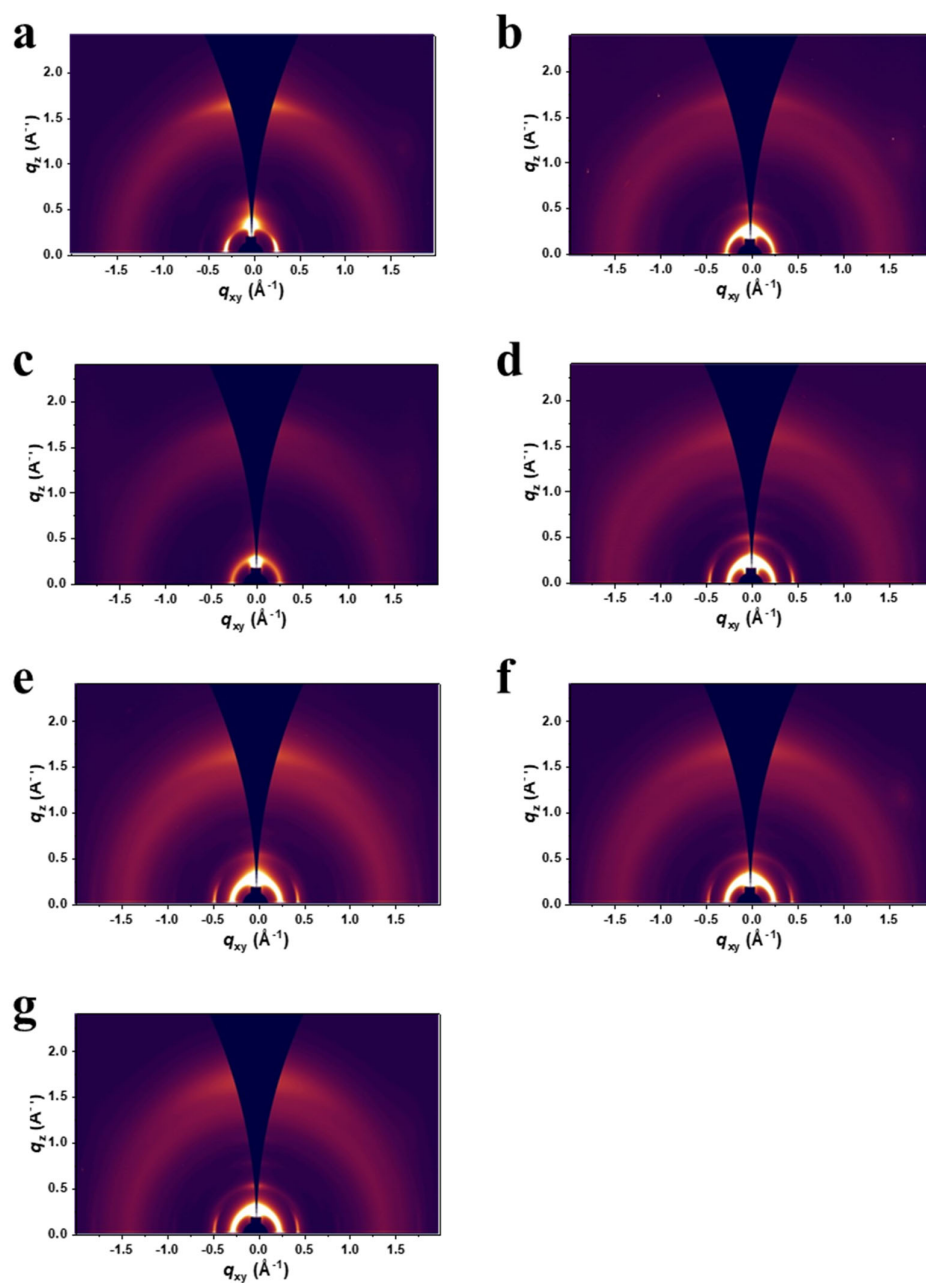

**Figure S10.** GIXD reciprocal mapping images of pure polymers and all-polymer blends. (a) P1, (b) P2, (c) P3, (d) N2200; (e) P1:N2200, (f) P2:N2200, (g) P3:N2200.

**Table S1.** Material information of three PDs used in this study (Amount,  $M_n$ ,  $M_w$ , and PDI)

|                                 | Amount (mg) | $M_n$ (kg/mol) | $M_w$ (kg/mol) | PDI ( $M_w/M_n$ ) |
|---------------------------------|-------------|----------------|----------------|-------------------|
| P1 (MC)<br>(used in this study) | 135.6       | 60.1           | 137.4          | 2.29              |

|                                 |       |      |       |      |
|---------------------------------|-------|------|-------|------|
| P1 (CF)                         | 64.6  | 81.0 | 167.9 | 2.07 |
| P2 (MC)                         | 223.9 | 34.7 | 89.9  | 2.60 |
| P2 (CF)<br>(used in this study) | 14.5  | 37.8 | 95.9  | 2.54 |
| P3 (MC)                         | 34.0  | 35.7 | 74.8  | 2.10 |
| P3 (CF)<br>(used in this study) | 246.0 | 42.2 | 89.3  | 2.12 |

**Table S2.** Comparison of our work with representative OPDs based on all-polymer-based photo-active materials.

| Ref.      | Photo-active layers         | Top electrode | Bottom electrode | Detectivity D* (Jones) | Wavelength (nm) |
|-----------|-----------------------------|---------------|------------------|------------------------|-----------------|
| This work | P1:N2200                    | Ag            | ITO              | $8.3 \times 10^{12}$   | 720             |
|           | P3:N2200                    |               |                  | $5.9 \times 10^{12}$   | 650             |
| [16]      | NT40<br>:PNDI-2T(N2200)     | Al            | ITO              | $2.6 \times 10^{13}$   | 720             |
| [33]      | PTzBI-Ph<br>:PNDI-2T(N2200) | Al            | ITO              | $5.7 \times 10^{12}$   | 600             |
| [34]      | PDPPT<br>:PNDI              | Al            | ITO              | $3.4 \times 10^{12}$   | 850             |
| [35]      | PDTP-DPP<br>:PNDI           | Al            | ITO              | $2.4 \times 10^{12}$   | 900             |
| [36]      | PBDP-T<br>:PNDI-DTBT        | Ag            | ITO              | $4.8 \times 10^{12}$   | 660             |
| [37]      | P3HT<br>:PIDT-2TPD          | Al            | ITO              | $1.1 \times 10^{12}$   | 610             |
| [38]      | PSBOTz<br>:PNE              | Ag            | ITO              | $1.8 \times 10^{12}$   | 532             |
